# Supplementary material for: Circulating bioactive adrenomedullin as a marker of sepsis, septic shock and critical illness
Source: Crit Care. 2020 Nov 4;24:636. doi: 10.1186/s13054-020-03351-1 (PMC7641835; doi:10.1186/s13054-020-03351-1)
Supplement: Supplementary file 1 — Additional file 1. Table S1: Suspected focus of infection and culture findings in the sepsis cohort. Table S2: Cutoffs, their corresponding positive and negative predictive values, likelihood ratios and AUCs for the different biomarkers. Figure S1: Sepsis patients according to shock status and 30-day survival with one of the eight most common bacteria found in blood cultures are plotted in relation to the suspected focus of infection on ICU admission. [file 13054_2020_3351_MOESM1_ESM.pdf]

# Additional file 1

## Circulating bioactive adrenomedullin as a marker of sepsis, septic shock and critical illness

**Table S 1: Suspected focus of infection and culture findings in the sepsis cohort.** Culture negative patients did not have any positive cultures within the time frame 24 hours before/after ICU admission.

|                                       | Sepsis cohort     |
|---------------------------------------|-------------------|
| <b>Suspected focus of infection</b>   |                   |
| Respiratory, n (%)                    | 342 (54%)         |
| Gastrointestinal, n (%)               | 88 (14%)          |
| Cardiovascular, n (%)                 | 6 (1%)            |
| Genitourinary, n (%)                  | 41 (6%)           |
| Musculo-dermato-haematological, n (%) | 27 (4%)           |
| Neurological, n (%)                   | 15 (3%)           |
| Unknown, n (%)                        | 113 (18%)         |
| <b>Sum</b>                            | <b>632 (100%)</b> |
| <b>Culture findings</b>               |                   |
| Positive blood culture, n(%)          | 139 (22%)         |
| Culture negative                      | 290 (46%)         |

**Table S 2: Cutoffs, their corresponding positive and negative predictive values, likelihood ratios and AUCs for the different biomarkers.** All cutoffs were Youden's index derived except bio-ADM>70 pg/mL. If data were missing available parameters were specified. *ICU: intensive care unit; AUC: area under the curve; PPV: positive predictive value; NPV: negative predictive value; LR+: positive likelihood ratio; LR-: negative likelihood ratio; bio-ADM: circulating bioactive adrenomedullin; CRP: c-reactive protein*

|                                            | Sensitivity | Specificity | AUC (95% CI)     | PPV | NPV | LR+  | LR-  |
|--------------------------------------------|-------------|-------------|------------------|-----|-----|------|------|
| <b>ICU population</b>                      |             |             |                  |     |     |      |      |
| <b>Cutoffs for 30-day mortality</b>        |             |             |                  |     |     |      |      |
| Bio-ADM>70 pg/mL                           | 42%         | 73%         | 0.61 (0.58-0.64) | 30% | 82% | 1.56 | 0.79 |
| Bio-ADM>45 pg/mL                           | 59%         | 58%         | 0.61 (0.58-0.64) | 28% | 84% | 1.40 | 0.71 |
| <b>Cutoff for identification of sepsis</b> |             |             |                  |     |     |      |      |
| Bio-ADM>37 pg/mL                           | 61%         | 80%         | 0.76 (0.73-0.78) | 51% | 86% | 2.05 | 0.33 |
| <b>Sepsis cohort</b>                       |             |             |                  |     |     |      |      |
| <b>Cutoffs for 30 day mortality</b>        |             |             |                  |     |     |      |      |
| Bio-ADM>70 pg/mL                           | 60%         | 50%         | 0.59 (0.53-0.64) | 31% | 77% | 1.20 | 0.80 |
| Bio-ADM>108 pg/mL                          | 48%         | 68%         | 0.59 (0.53-0.64) | 36% | 77% | 1.51 | 0.77 |
| CRP>117 mg/L (n=600)                       | 59%         | 54%         | 0.54 (0.49-0.59) | 32% | 78% | 1.29 | 0.75 |
| Lactate>3.1 mmol/L (n=626)                 | 55%         | 59%         | 0.58 (0.53-0.63) | 34% | 77% | 1.34 | 0.76 |

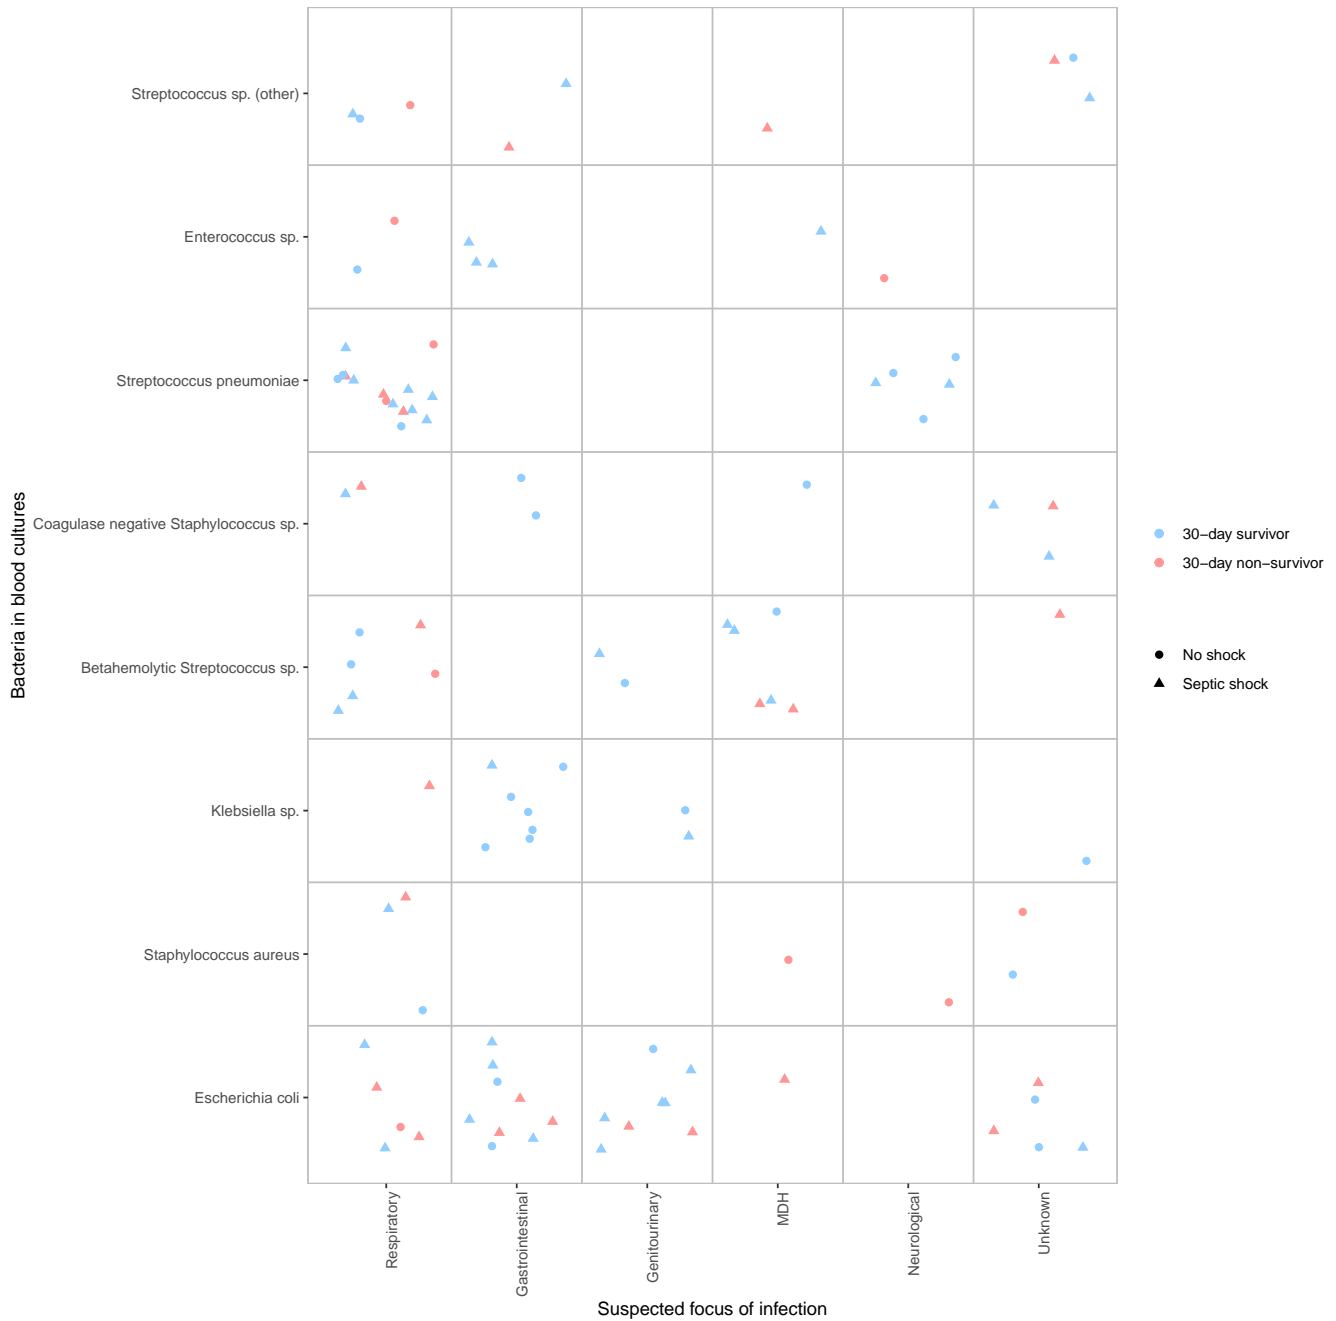

Figure S 1: Sepsis patients according to shock status and 30-day survival with one of the eight most common bacteria found in blood cultures are plotted in relation to the suspected focus of infection on ICU admission. A total of 105 blood culture findings in 98 ICU admissions are included in the figure. Seven admissions had two different bacteria and are thus plotted twice. *MDH*, *musculo-dermato-haematological*
